# Supplementary material for: The HNF1α-regulated lncRNA HNF1A-AS1 reverses the malignancy of hepatocellular carcinoma by enhancing the phosphatase activity of SHP-1
Source: PubMed Central journal article supplement (PMC5822613; doi:10.1186/s12943-018-0813-1), 2018-02-21
Supplement: 12943_2018_813_MOESM1_ESM.pdf [file 12943_2018_813_MOESM1_ESM.pdf]

## **Supplementary Information**

**The HNF1 $\alpha$ -regulated lncRNA HNF1A-AS1 reverses the malignancy of hepatocellular carcinoma by enhancing the phosphatase activity of SHP-1**

Chen-Hong Ding, Chuan Yin, Shi-Jie Chen, Liang-Zhi Wen, Kai Ding, Shu-Juan Lei, Jin-Pei Liu, Jian Wang, Kai-xian Chen, Hua-liang Jiang, Xin Zhang, Cheng Luo, Wei-Fen Xie

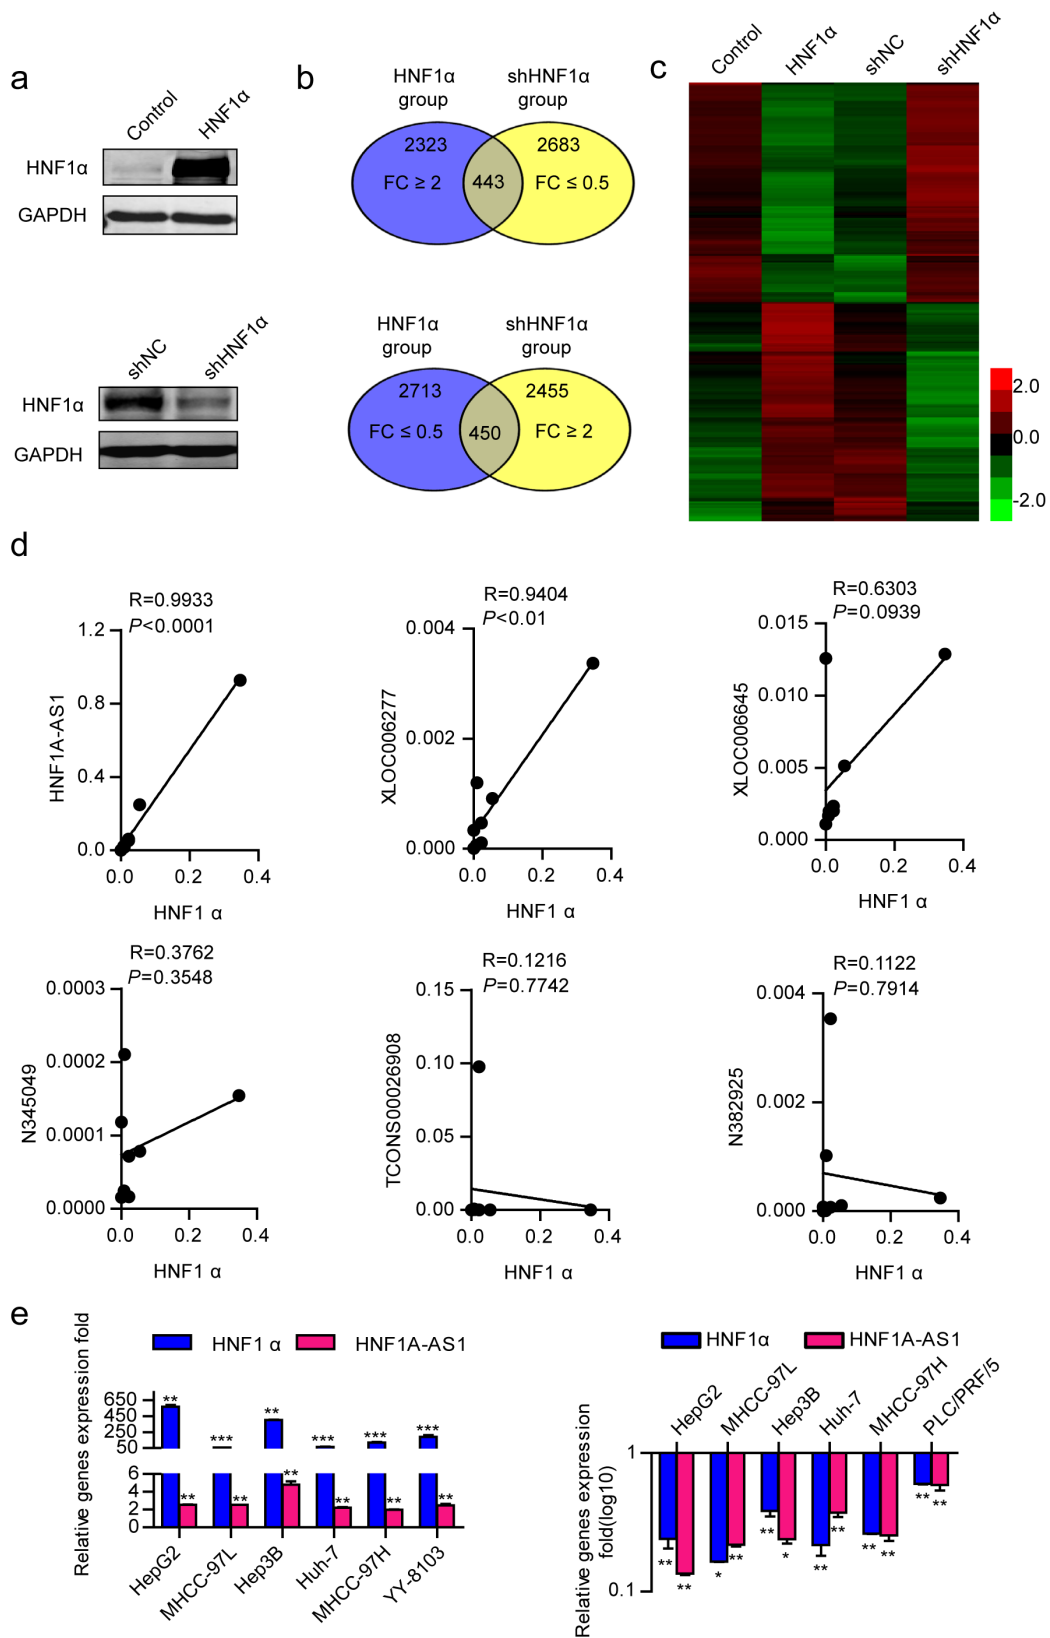

or Lenti-shHNF1 $\alpha$  and Lenti-shNC. (b) Venn diagram depicting the differentially expressed lncRNAs in Huh-7 cells with HNF1 $\alpha$  overexpression (HNF1 $\alpha$  group) and HNF1 $\alpha$  knockdown (shHNF1 $\alpha$  group). The blue circles represent the number of lncRNAs upregulated (fold-change  $\geq 2$ ) or downregulated (fold-change  $\leq 0.5$ ) in HNF1 $\alpha$  group. The yellow circles show the number of lncRNAs differentially expressed in shHNF1 $\alpha$  group. FC: fold-change. (c) Heatmap representing the 443 HNF1 $\alpha$ -upregulating lncRNAs and the 450 HNF1 $\alpha$ -downregulating lncRNA in Huh-7 cells. Expression levels are represented in shades of red and green, indicating the expression levels above and below the median value across all the samples, respectively (2-fold, FDR<0.5). (d) Pearson's correlation analysis of the expression levels of HNF1 $\alpha$  and the 6 selected lncRNAs in different HCC cell lines (n=8). (e) HNF1 $\alpha$  overexpression (left) increased whereas HNF1 $\alpha$  knockdown (right) decreased the expression of HNF1A-AS1 in HCC cells. Data represent the mean $\pm$ SD.

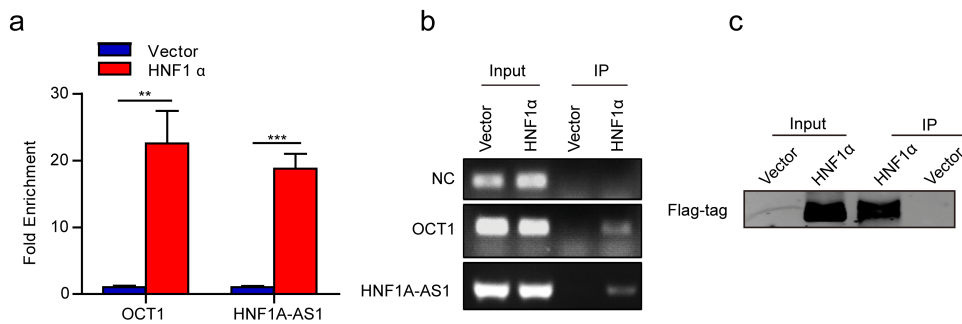

**Figure S2. HNF1 $\alpha$  directly binds to the promoter region of HNF1A-AS1.**

ChIP assay performed in Huh-7 cells transfected with pCMV-Flag-HNF1 $\alpha$ . (a,b) Real-time PCR (a) and semiquantitative PCR (b) were performed to examine the DNA fragments immunoprecipitated by anti-Flag M2 beads with primers against HNF1 $\alpha$ -RE. (c) Western blotting analysis using anti-Flag antibody.

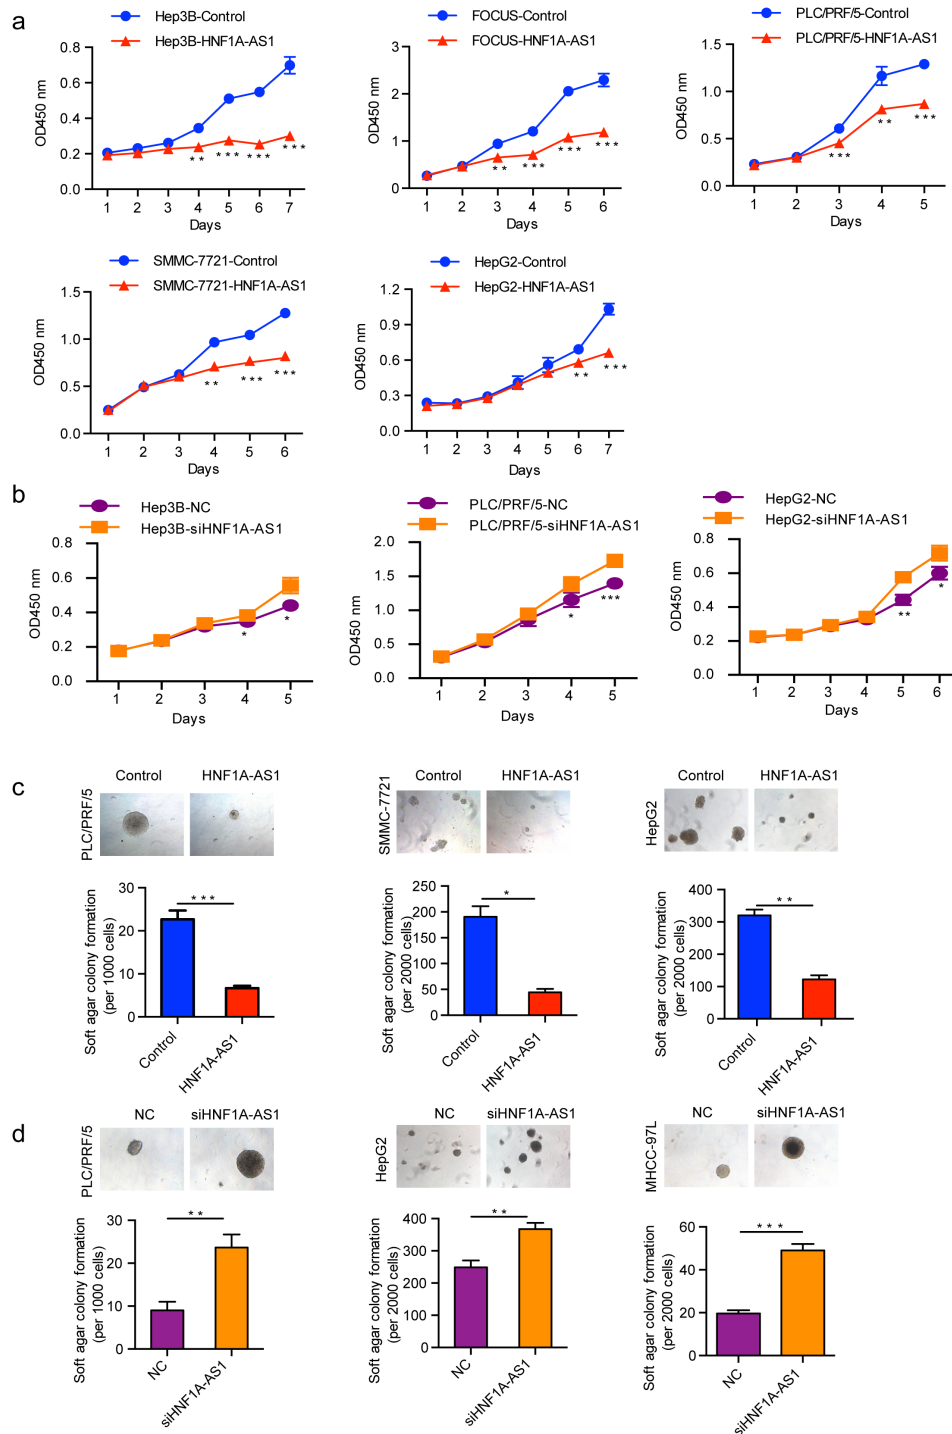

**Figure S3. HNF1A-AS1 suppresses the malignancy of HCC cells.**

(a,b) Proliferation was measured using the CCK-8 assay in HCC cells infected with Lenti-HNF1A-AS1 (a) or transfected with siHNF1A-AS1 (b). (c,d) Soft agar colony formation assays were performed in HCC cells treated with Lenti-HNF1A-AS1 (c) or

siHNF1A-AS1 (d).

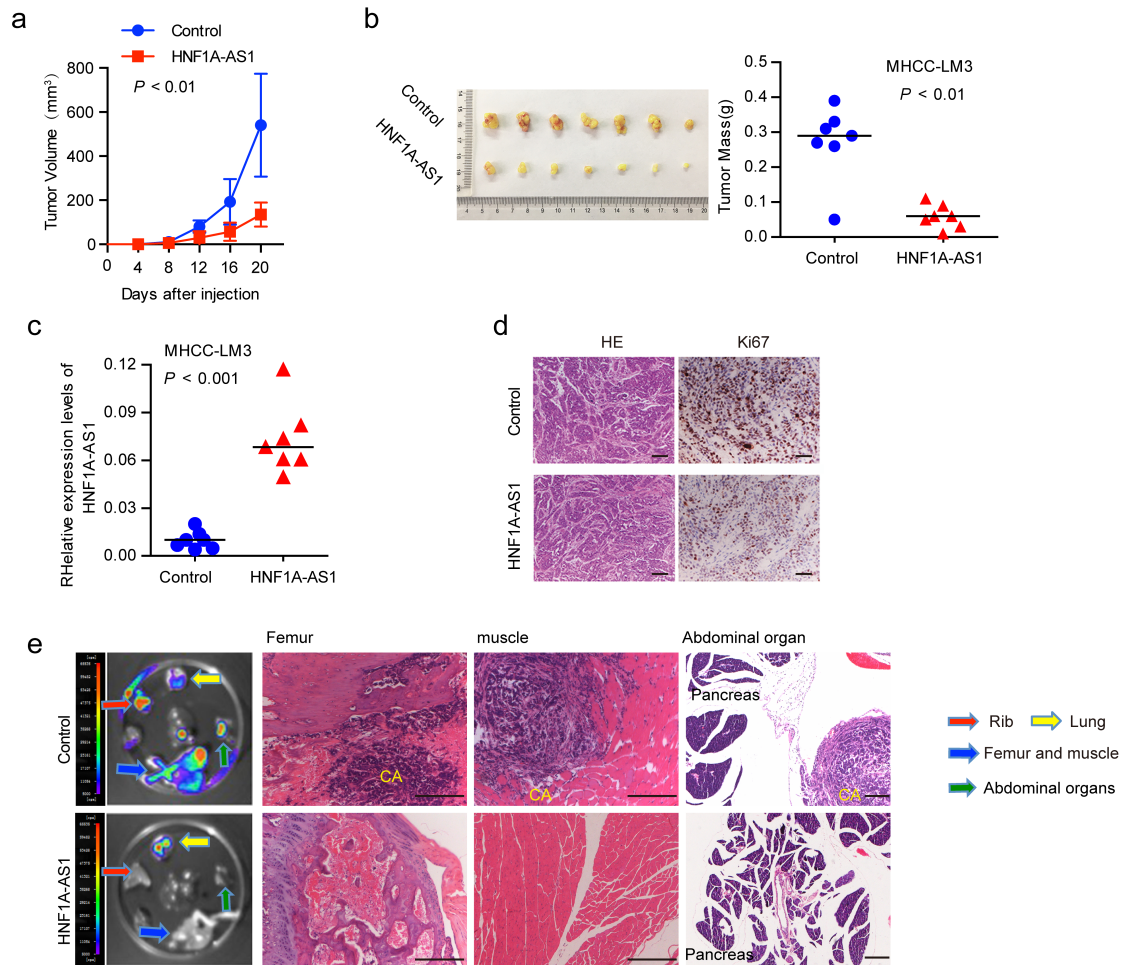

**Figure S4. Enforced expression of HNF1A-AS1 suppresses tumourigenicity and metastasis of MHCC-LM3 cells.**

(a) Growth curves of xenografts (n=7 in each group). (b) Images and tumour weight of the xenografts. (c) Expression levels of HNF1A-AS1 in tumour nodules. (d) HE staining and Ki67 staining of the xenografts tissues. Scale bars, 200  $\mu$ m. (e) Luciferase-labelled MHCC-LM3 cells pre-infected with Lenti-HNF1A-AS1 or control virus were injected into NOD/SCID mice through the tail veins. Representative images of luciferase signals and HE staining showed metastatic nodules in different organs.

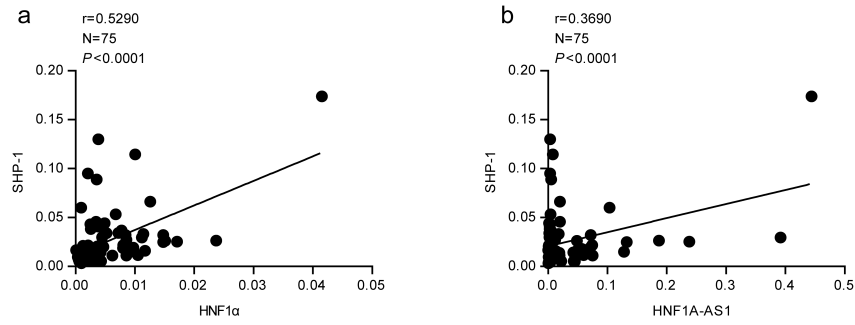

**Figure S5.** The correlation analysis between the expression levels of HNF1 $\alpha$  (a) or HNF1A-AS1 (b) and SHP-1 levels in human HCC tissues.

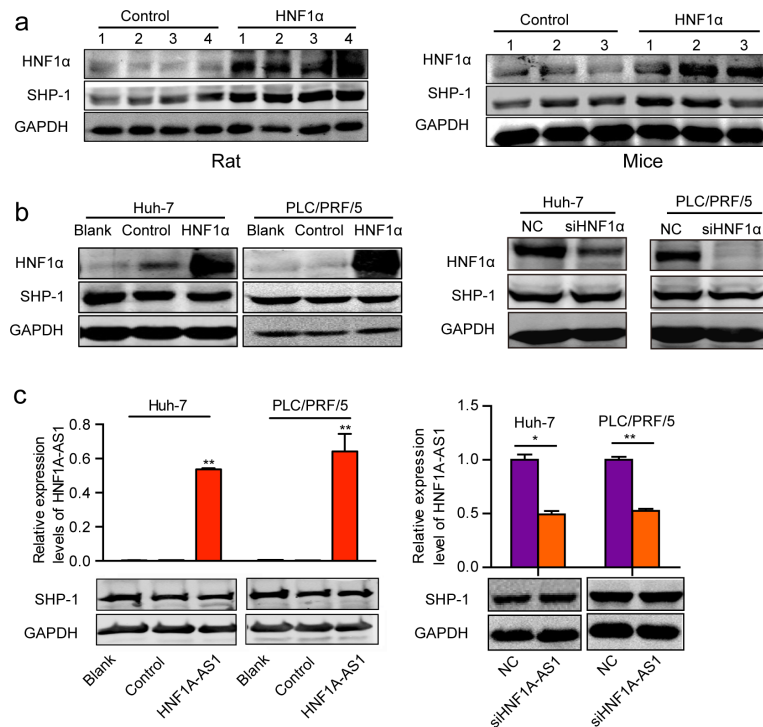

**Figure S6.** HNF1 $\alpha$  and HNF1A-AS1 do not regulate the expression of SHP-1 in human HCC cells.

(a) HNF1 $\alpha$  upregulates the expression of SHP-1 in primary rat (left) and mouse (right) hepatocytes. (b) Overexpression and knockdown of HNF1 $\alpha$  does not affect the expression of SHP-1 in Huh-7 and PLC/PRF/5 cells. (c) HNF1A-AS1 does not regulate the expression of SHP-1 in HCC cells. Data represent the mean  $\pm$  SD

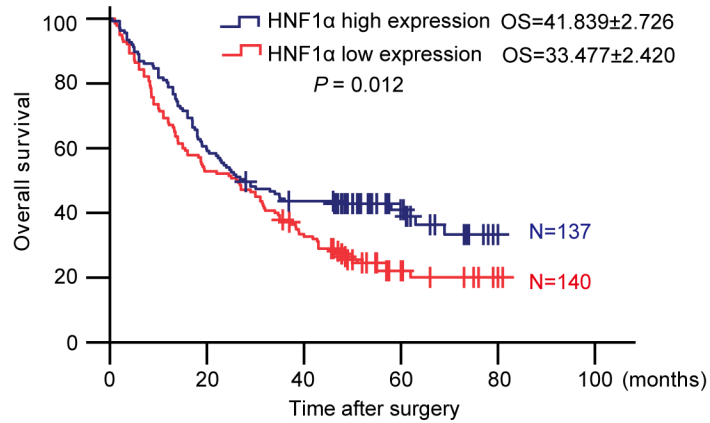

**Figure S7. Reduction of HNF1 $\alpha$  predicts poor prognosis of patients.**

Tissue microarrays containing 277 HCC samples were performed to detect HNF1 $\alpha$  protein levels. Kaplan–Meier analysis of the overall survival (OS) of 277 HCC patients. The median HNF1 $\alpha$  protein level for all 277 HCC samples was chosen as the cut-off point.  $P = 0.012$  by the log-rank.

**Table S1. Oligonucleotides used in real-time PCR, cloning and knockdown studies.**

**Primer sequences for real-time PCR.**

| <b>Genes</b>                            | <b>Forward primer (5'- 3')</b>   | <b>Reverse primer (5'- 3')</b> |
|-----------------------------------------|----------------------------------|--------------------------------|
| <b>Primers for real-time PCR</b>        |                                  |                                |
| $\beta$ -actin                          | CATCCTGCGTCTGGACCT               | GTACTTGCCTCAGGAGGAG            |
| HNF1 $\alpha$                           | CCATCCTCAAAGAGCTGGAG             | TGTTGTGCTGCTGCAGGTA            |
| n382925                                 | CTTTGGTTCAGGCACTATTA             | AGAGTGGCTTTGTGAAGGT            |
| n345049                                 | ATAAAGGTAATGTGGGCAAGG            | TCTGGAGGAGACAGGTGGC            |
| HNF1A-AS1                               | CAAGAAATGGTGGCTATGA              | TGGAAGGACAAGGGT                |
| XLOC006645                              | TATGAGATATGGAAGGACGAA            | CCAATGAGATCACAGGGAG            |
| XLOC006277                              | ACTTGGATTGATGGTGGTC              | ACTGGCAGAACTGGTGATT            |
| TCONS_00026908                          | CCTTCACTTTGGGCAATCTT             | AGTTTATATTGCGGCCAAGC           |
| <b>Primers for Northern blotting</b>    |                                  |                                |
| actin                                   | AGAAGAGCTACGAGCTGCCTGACG         | TAGAAGCATTTCGGTGGACGAT         |
| HNF1A-AS1                               | TTCTCGTATGGATGTACTAACGGGA        | CTCTGAGACTGGCTGAAGGGAC         |
| <b>Primers for RACE</b>                 |                                  |                                |
|                                         | CCTCCCGTTAGTACATCCATACGAGAA      |                                |
| 5' RACE                                 | G                                |                                |
| 3' RACE                                 | AAGAAAAGTTTTGGCCGGGAGCGGTG       |                                |
| <b>Primers for ChIP assay</b>           |                                  |                                |
| CHIP-NC                                 | CTGGCTCGTGGGTAAGAATTGTCTC        | ATGTCCAAGGCAATGCTAGGTAA        |
|                                         |                                  | A                              |
| OCT1                                    | GGCAGCGAGATCGAAGGACAAGTGT        | TCTCCTGCCTTCGGGTTTTCTCCAA      |
| HNF1A-AS1                               | GAACCACTGAGAAAAAAGC              | ATAGGTGCCCACTGACAAGC           |
| <b>Primers for plasmid construction</b> |                                  |                                |
| <b>Genes</b>                            | <b>5'-3'</b>                     |                                |
| HNF1 $\alpha$ -Forward                  | CCGGAATTCCGAGCCATGGTTTCTAAACTGAG |                                |
| HNF1 $\alpha$ -Reverse                  | CGCGGATCCTTACTGGGAGGAAGAGGCCAT   |                                |
| HNF1A-AS1-Forward (2785 bp)             | CCCAAGCTTGGAACAGCCGGACATGGTAG    |                                |



---

|                                       |                                    |
|---------------------------------------|------------------------------------|
| HNF1A-AS1-Reverse (2785 bp)           | CGGGGTACCGACGGAGTTTCGTTCTTGTTCC    |
| HNF1A-AS1-enhancer-Forward (Reporter) | CCCAAGCTT CCTCACCCACCAGCCACAT      |
| HNF1A-AS1-enhancer-Reverse (Reporter) | CCGCTCGAGAAAAGTAAAATGGAACAGGTGAAGT |

**Primers for SHP-1 domain deletion plasmid construction**

|                   |                                    |
|-------------------|------------------------------------|
| 1-Forward         | CCGGAATTCTGGTTTCACCGAGACCTCAGT     |
| 110-Forward       | CCGGAATTCAGTGAGAGGTGGTACCATGGC     |
| 245-Forward       | CCGGAATTCGGCTTCTGGGAGGAGTTGAG      |
| 217- Reverse      | CCGCTCGAGATAGTACGGCTGCCGCAGG       |
| 516- Reverse      | CCGCTCGAGTTCAATGAACTGGGCGATGGC     |
| 597- Reverse      | CCGCTCGAGTCACTTCCTCTTGAGGGAACCC    |
| Δ110-217-Forward  | AAGTACCCGCTGAACGGCTTCTGGGAGGAGTTTG |
| Δ110-217- Reverse | CTCCCAGAAGCCGTTTCAGCGGGTACTTGAGG   |

---

**Sequences of siRNAs**

---

|             |                                  |
|-------------|----------------------------------|
| NC (Human)  | 5'-UUCUCCGAACGUGUCACGUtt-3'      |
| siHNF1A-AS1 | 5'-CACCUGCAUCAAACUCGGACUGUUtt-3' |

---

**Table S3. Binding motif of lncRNA promoter regions for HNF1 $\alpha$  RE**

| Name                      | Chromosome location          | Source database             | Binding motif  | Score  |
|---------------------------|------------------------------|-----------------------------|----------------|--------|
| HNF1A-AS1                 | chr12:121407641-121410095(-) | NCBI                        | AGTTAACATTTAGA | 10.083 |
| TCONS-00026908            | chr19:15939785-15940818 (+)  | Broad Institute/<br>UCSC    | ATTTAATTATTATT | 10.033 |
| XLOC-006277/n369860       | chr7:142199954-142223674(+)  | NONCODE/<br>Broad Institute | GATTAAAAATTAAT | 10.646 |
| XLOC006645/TCONS_00014006 | chr7:149929650-149934873(-)  | Broad Institute             | GGTTAGTATATATA | 9.515  |
| n345049                   | chr9:70529060-70530580(+)    | NONCODE                     | ATTTATTTATTAC  | 9.439  |
| n382925                   | chr16:20499023-20500981(+)   | NONCODE                     | GGTTCACAATTACC | 10.606 |
